# Supplementary material
Source: publisher figshare collection journal article supplement (https://frontiersin.figshare.com/ndownloader/files/29112036)
Supplement: Supplementary file [file 29112036]

**Figure S1. Random forests (RF) models of disease cohort using gut species level abundances. Related to Figure 1.** (a) Receiver operating characteristic (ROC) curves of binary RF classification models for each group as indicated versus 'normal-BMI' baseline. (b) Distribution of BMI and species-level relative abundances for the features selected in the multiclass RF model (violin plots). RF model importance values are shown as shaded boxes with darker colors denoting higher mean importance.

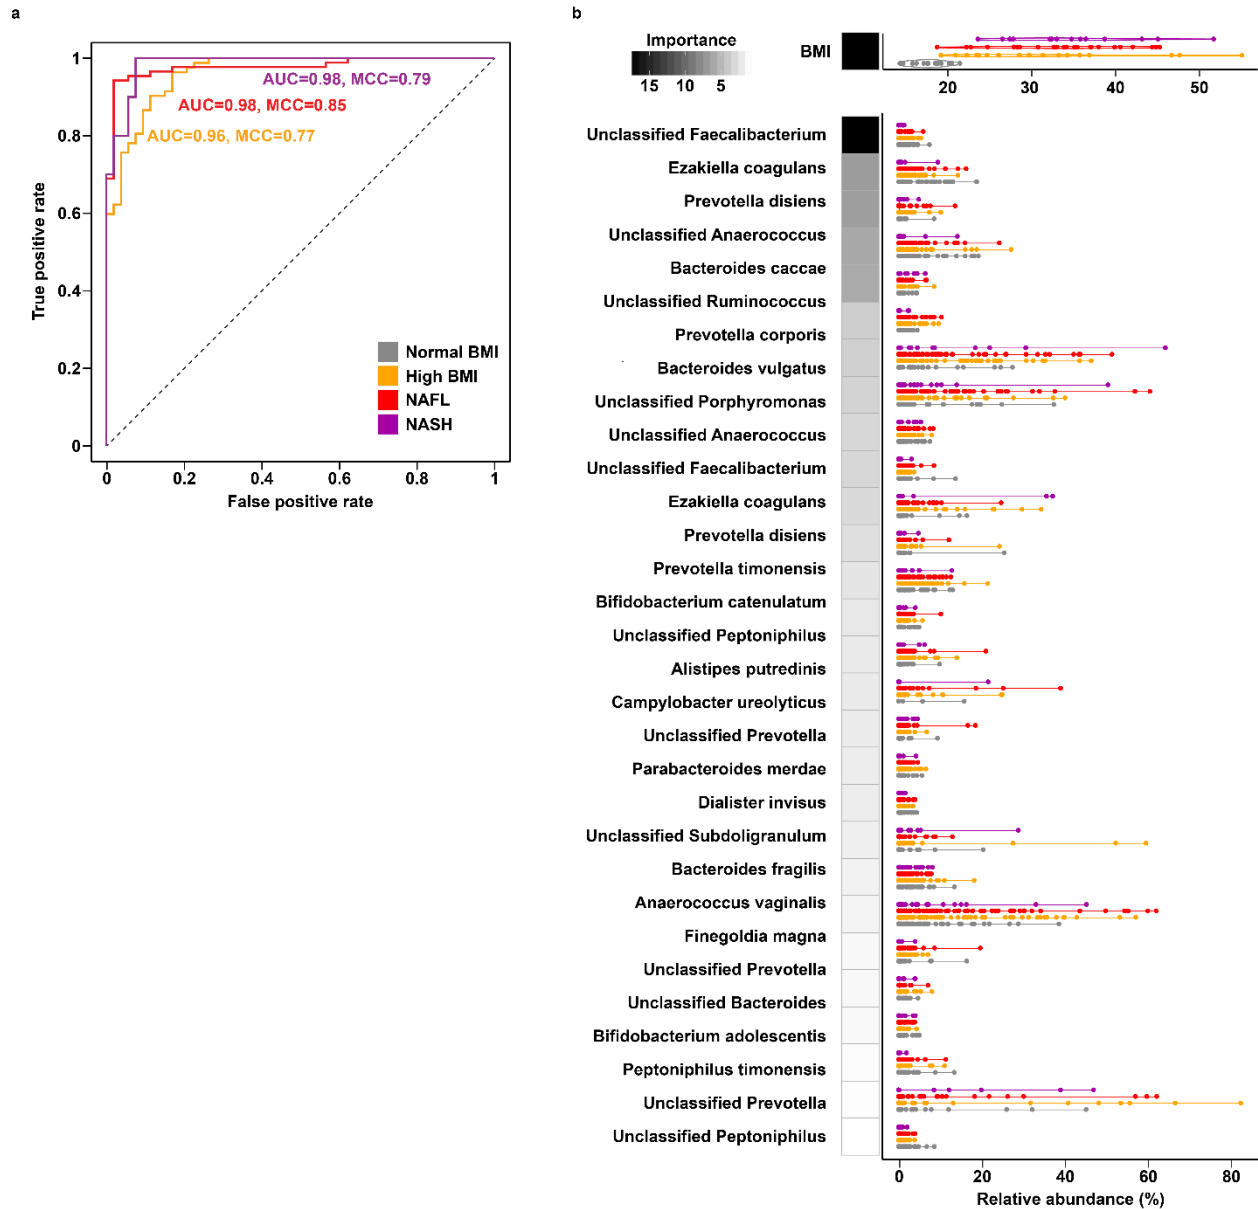

## Figure S2. Oral microbiome composition in progressive fatty liver disease.

**Related to Figure 1.** (a) Principal coordinates analysis (PCoA) plot of oral microbiota composition using Bray-Curtis distances. Ellipses show 95% confidence regions for each cohort. Percentages in brackets denote variation explained by each axis. (b) Boxplots show no significant differences in Shannon diversity (KW  $p=0.771$ ) (top) and increased log-transformed *Bacteroidetes* to *Firmicutes* ratio (KW  $p=0.07498$ ) (bottom) with advancing liver disease. (c) Receiver operating characteristic (ROC) curves of binary RF classification models for each group as indicated versus 'normal-BMI' baseline. (d) Distribution of BMI and genus-level relative abundances for the features selected in the multiclass RF model (violin plots). RF model importance values are shown as shaded boxes with darker colors denoting higher mean importance. (e) Heatmap of importance values for RF models of liver histology findings. Positive (red) and negative (blue) values indicate genera that are increased and decreased with higher grades of each finding, respectively. Asterisks (\*) denote genera that are also significant ( $p<0.1$ ) in ZINB regression analyses.

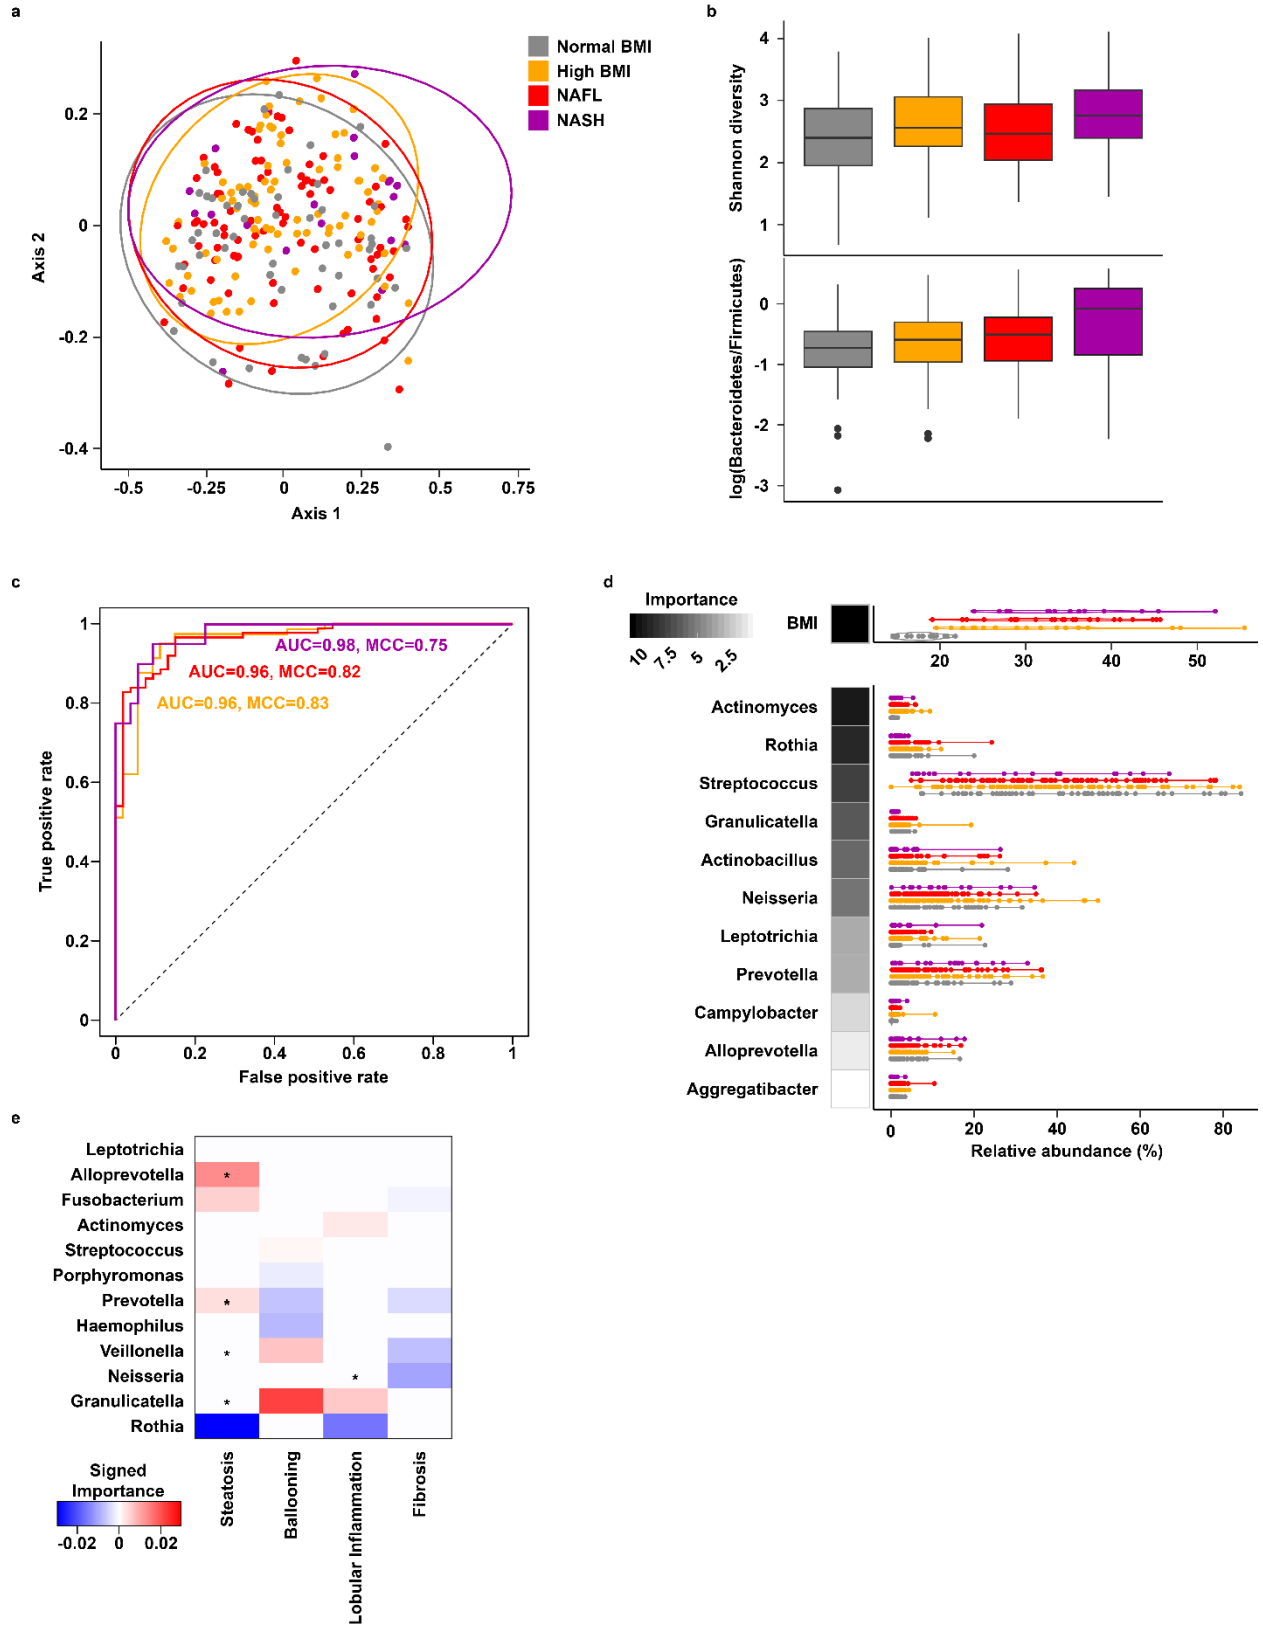

**Figure S3. Gut microbiome composition in NASH (n=20) and normal-BMI (n=20) cohorts by shotgun metagenomics. Related to Figure 1.**

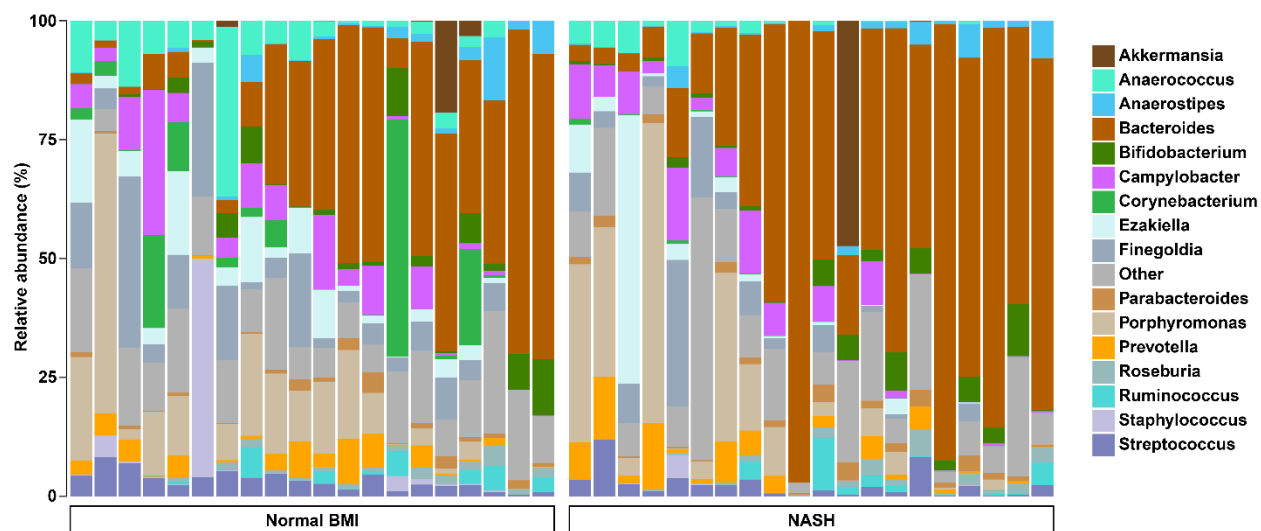

**Figure S4. Taxonomic drivers of functional shifts in NASH. Related to Figure 1.**

Overall enrichment of each KEGG pathway is denoted by an open diamond (◇). Taxa attenuating each functional shift are shown to the left of the vertical line, and taxa driving each functional shift are shown to the right of the vertical line. For each KEGG pathway, taxa shown along the top are increased in NASH and taxa shown along the bottom are decreased in NASH.

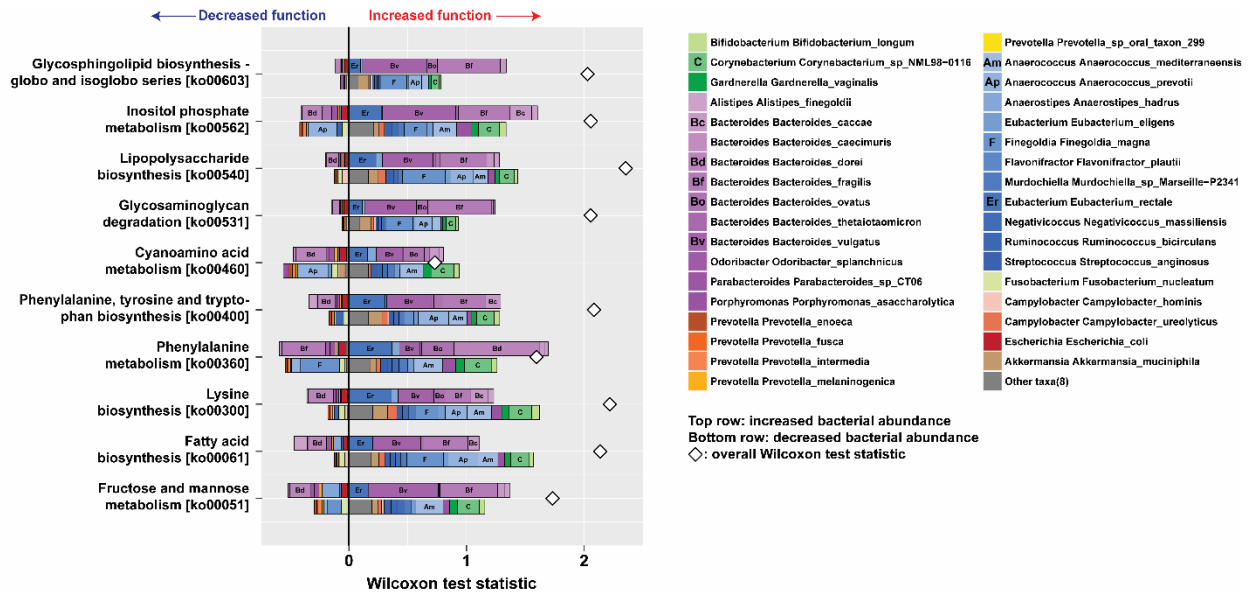

**Figure S5. Plasma metabolite binary classification models against ‘high-BMI’ baseline. Related to Figure 3.** Heatmap of importance values for RF models versus ‘high-BMI’ baseline. Shaded cells denote metabolites selected as features in each model. Red asterisks (\*) denote metabolites identified as significantly altered in each group by linear regression.

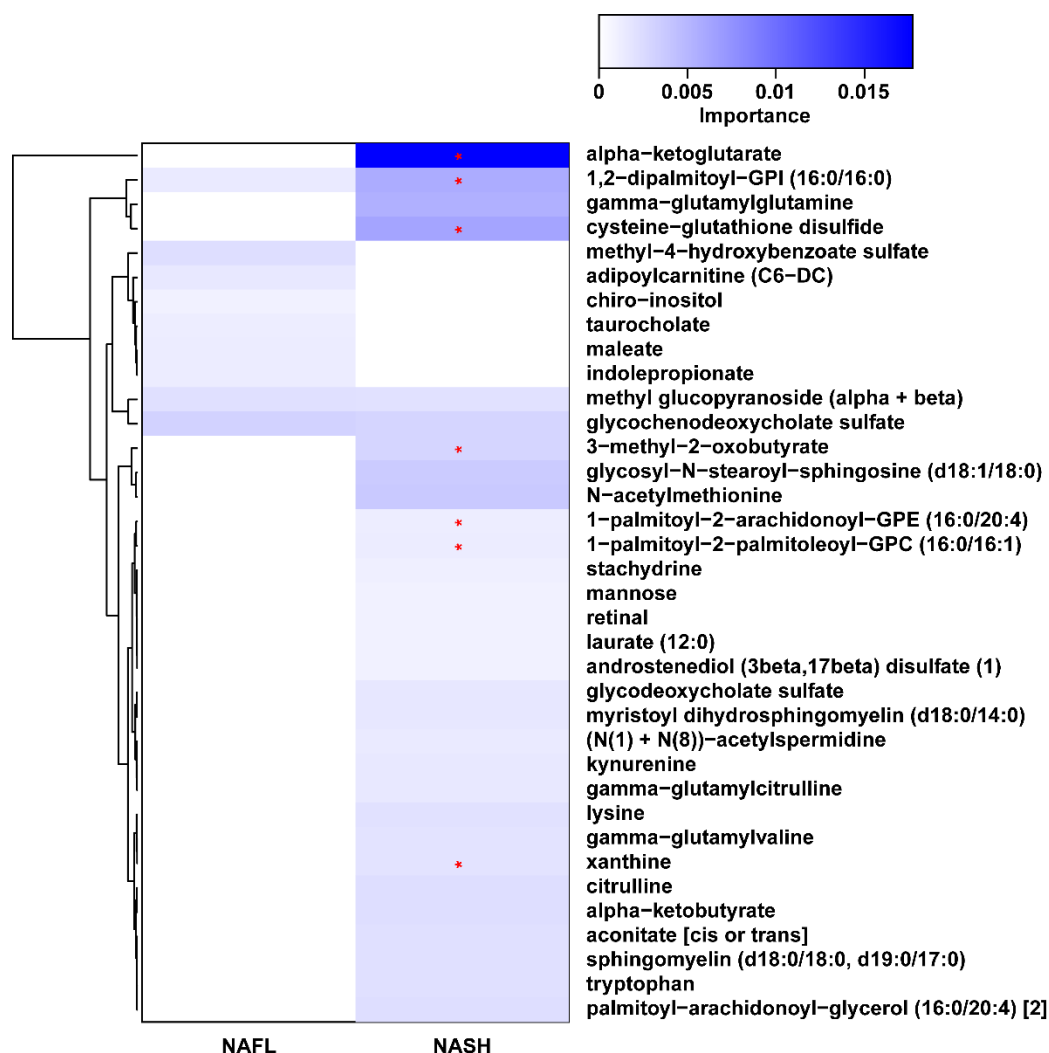

**Figure S6. Fecal metabolite signatures of progressive fatty liver disease. Related to Figure 2.** (a) t-SNE plot of fecal metabolite profiles. Ellipses show 95% confidence regions for each cohort. (b) Receiver operating characteristic (ROC) curves of binary RF classification models for each group as indicated versus 'normal-BMI' baseline. (c) Distribution of BMI and metabolite values for the features selected in the multiclass RF model (violin plots). RF model importance values are shown as shaded boxes with darker colors denoting higher mean importance. (d) Heatmap of importance values for RF models of liver histology findings. Positive (red) and negative (blue) values indicate metabolites that are increased and decreased with higher grades of each finding, respectively.

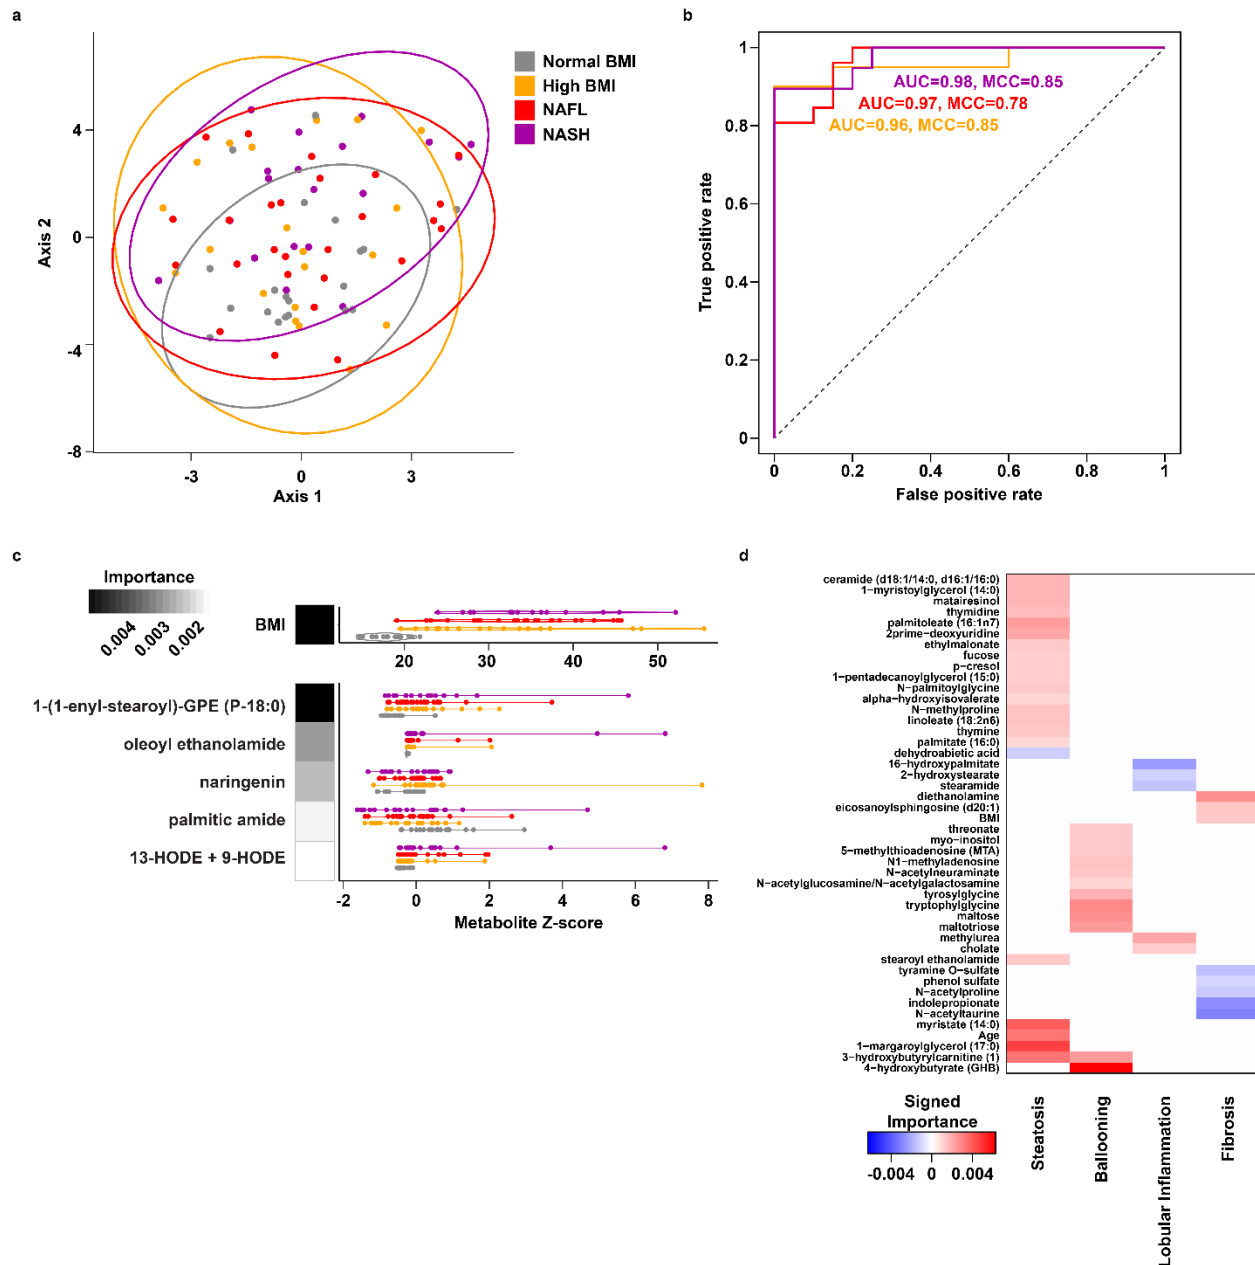

**Figure S7. Fecal metabolite binary classification models against ‘high-BMI’ baseline. Related to Figure 3.** (a) ROC curves of binary RF models for each group as indicated versus ‘high-BMI’ baseline. (b) Heatmap of importance values for RF models versus ‘high-BMI’ baseline. Shaded cells denote metabolites selected as features in each model.

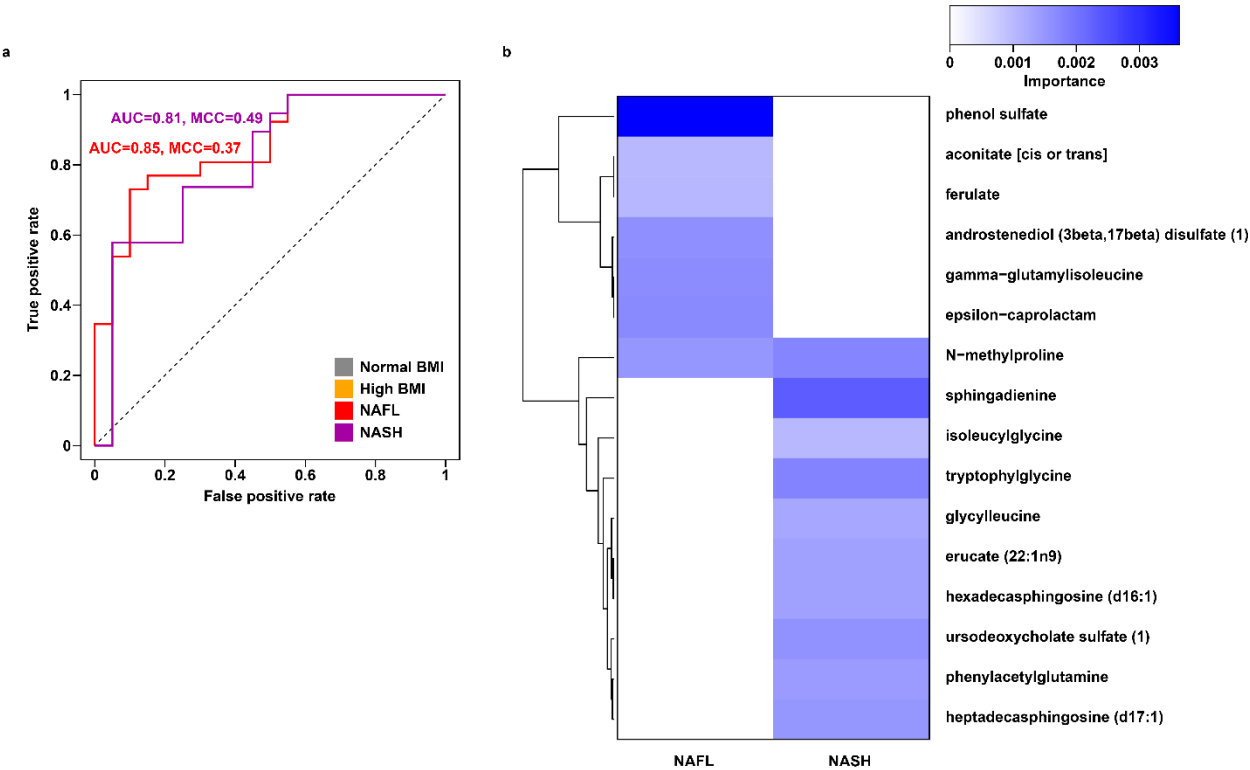



## Figure S8. Plasma metabolite drivers of misclassification in histology findings.

**Related to Figure 4.** Ground truth labels based on original clinical diagnosis for steatosis (a), lobular inflammation (b), and fibrosis (c) are shown along the x-axis. Predicted labels are shown as the indicated colors, and each point represents one individual.

a

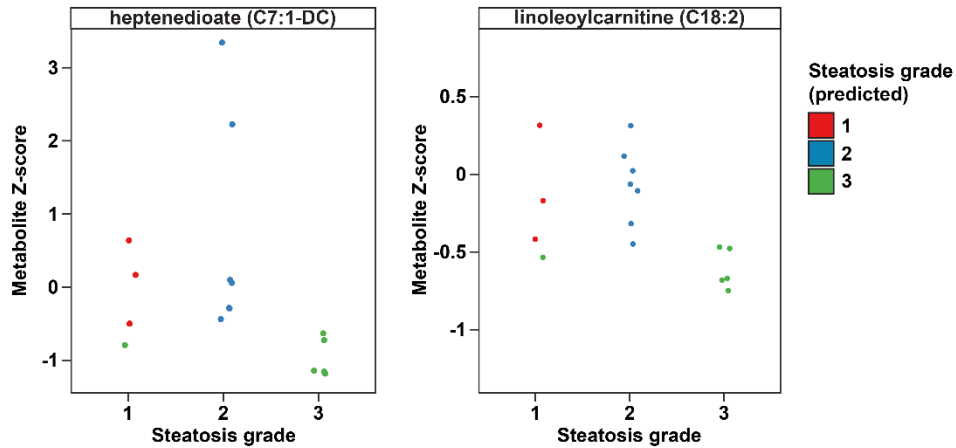

b

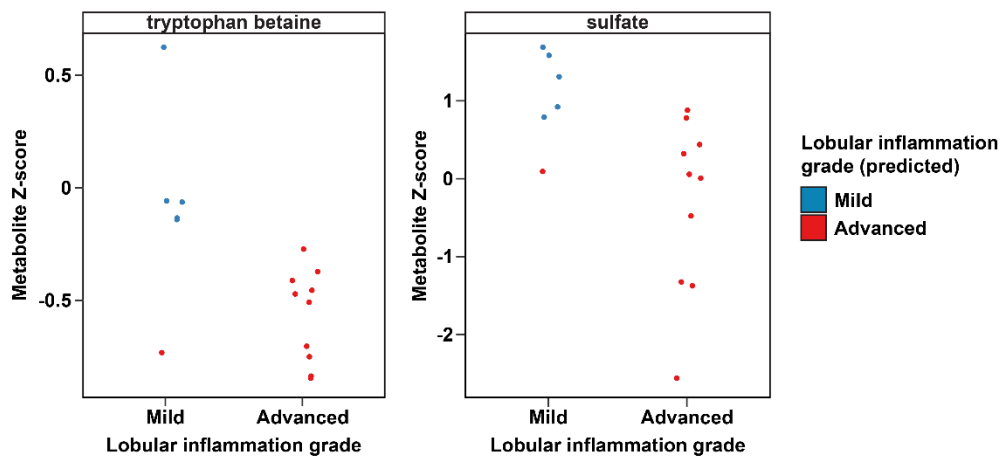

c

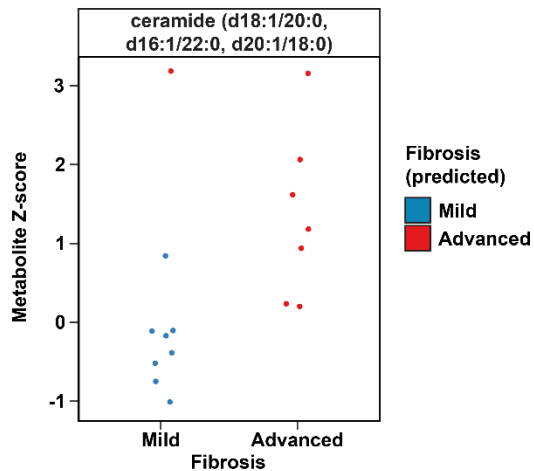

**Figure S9. Relationships between alpha-ketoglutarate, cysteine-glutathione disulfide, and N-acetylmethionine. Related to all Figures.** Alpha-ketoglutarate and cysteine-glutathione disulfide were increased (red text) in subjects with NASH, while N-acetyl-methionine was decreased (blue text). NAT = N-acetyl transferases, SAM = S-adenosylmethionine, SAH = S-Adenosyl-L-homocysteine, GLS = glutaminase, ALT = alanine transaminase, GS = [glutathione synthetase](#), GSH = glutathione, GGT = gamma-glutamyltransferase, GSSG = [glutathione disulfide](#), AA = amino acid, THF = tetrahydrofolate, cys = cysteine, gly = glycine

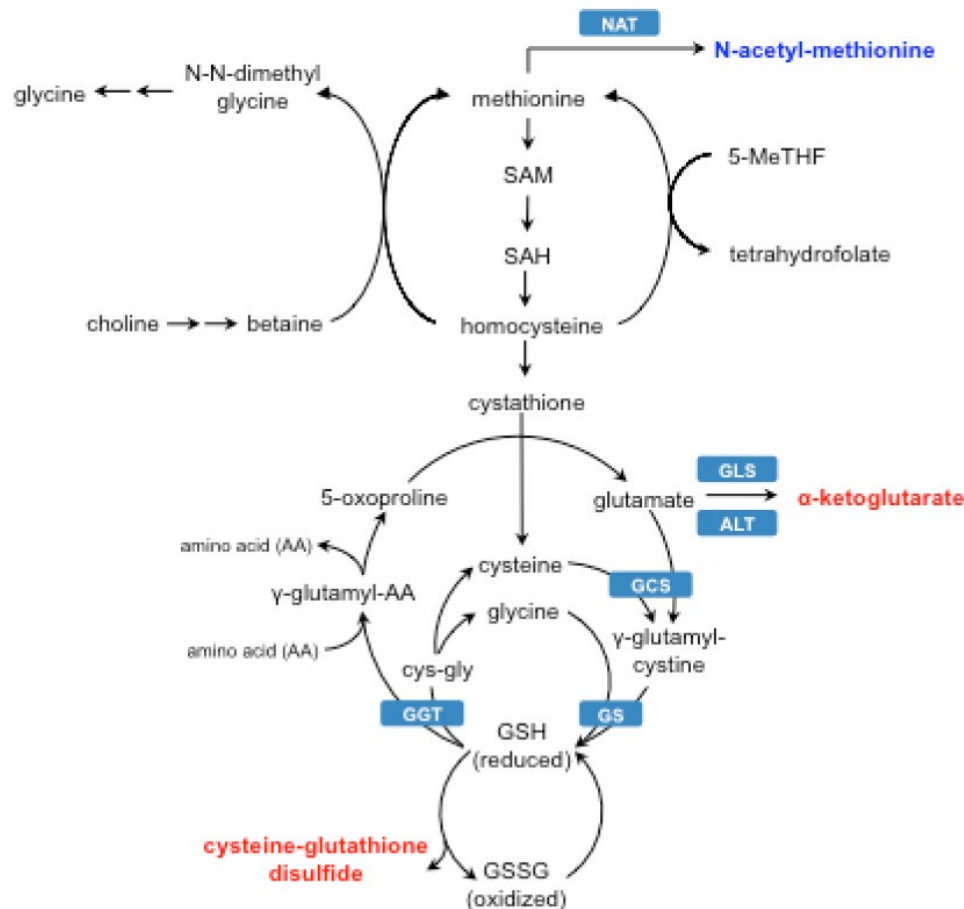

**Table S1. PERMANOVA results for 16S microbiome profiling. Related to Figure 1.**

|                           |                      |                |
|---------------------------|----------------------|----------------|
| <b>Rectal Swabs</b>       |                      |                |
| <b>Bray-Curtis metric</b> |                      |                |
| <b>Variable</b>           | <b>R<sup>2</sup></b> | <b>p-value</b> |
| Cohort                    | 0.02251              | 0.024          |
| Age                       | 0.01030              | 0.017          |
| Sex                       | 0.02575              | 0.001          |
| BMI                       | 0.00450              | 0.542          |
| Vitamin E                 | 0.00400              | 0.748          |
| Metformin                 | 0.00462              | 0.568          |
| <b>Jaccard metric</b>     |                      |                |
| <b>Variable</b>           | <b>R<sup>2</sup></b> | <b>p-value</b> |
| Cohort                    | 0.02047              | 0.021          |
| Age                       | 0.00819              | 0.034          |
| Sex                       | 0.01760              | 0.001          |
| BMI                       | 0.00469              | 0.665          |
| Vitamin E                 | 0.00454              | 0.739          |
| Metformin                 | 0.00514              | 0.485          |
| <b>JSD metric</b>         |                      |                |
| <b>Variable</b>           | <b>R<sup>2</sup></b> | <b>p-value</b> |
| Cohort                    | 0.02516              | 0.025          |
| Age                       | 0.01278              | 0.014          |
| Sex                       | 0.03933              | 0.001          |
| BMI                       | 0.00479              | 0.476          |
| Vitamin E                 | 0.00330              | 0.763          |
| Metformin                 | 0.00400              | 0.648          |
| <b>Oral Swabs</b>         |                      |                |
| <b>Bray-Curtis metric</b> |                      |                |
| <b>Variable</b>           | <b>R<sup>2</sup></b> | <b>p-value</b> |
| Cohort                    | 0.02542              | 0.038          |
| Age                       | 0.01840              | 0.002          |
| Sex                       | 0.00702              | 0.189          |
| BMI                       | 0.00414              | 0.626          |
| Vitamin E                 | 0.00678              | 0.210          |
| Metformin                 | 0.00345              | 0.772          |
| <b>Jaccard metric</b>     |                      |                |
| <b>Variable</b>           | <b>R<sup>2</sup></b> | <b>p-value</b> |
| Cohort                    | 0.02262              | 0.026          |
| Age                       | 0.01524              | 0.003          |
| Sex                       | 0.00625              | 0.193          |
| BMI                       | 0.00486              | 0.524          |
| Vitamin E                 | 0.00691              | 0.147          |
| Metformin                 | 0.00434              | 0.673          |
| <b>JSD metric</b>         |                      |                |
| <b>Variable</b>           | <b>R<sup>2</sup></b> | <b>p-value</b> |
| Cohort                    | 0.02930              | 0.020          |

|           |         |       |
|-----------|---------|-------|
| Age       | 0.02382 | 0.002 |
| Sex       | 0.00972 | 0.072 |
| BMI       | 0.00501 | 0.433 |
| Vitamin E | 0.00667 | 0.250 |
| Metformin | 0.00286 | 0.771 |

**Table S2. Association between microbiome relative abundances and liver enzyme levels. Related to Figure 1.**

**Table S3. PERMANOVA results for shotgun microbiome profiling. Related to Figure 1.**

|                           |                      |                |
|---------------------------|----------------------|----------------|
| <b>Rectal Swabs</b>       |                      |                |
| <b>Bray-Curtis metric</b> |                      |                |
| <b>Variable</b>           | <b>R<sup>2</sup></b> | <b>p-value</b> |
| Cohort                    | 0.03508              | 0.159          |
| Age                       | 0.02703              | 0.319          |
| Sex                       | 0.05302              | 0.040          |
| BMI                       | 0.01157              | 0.933          |
| <b>Jaccard metric</b>     |                      |                |
| <b>Variable</b>           | <b>R<sup>2</sup></b> | <b>p-value</b> |
| Cohort                    | 0.03028              | 0.206          |
| Age                       | 0.02876              | 0.248          |
| Sex                       | 0.04363              | 0.048          |
| BMI                       | 0.01522              | 0.965          |
| <b>JSD metric</b>         |                      |                |
| <b>Variable</b>           | <b>R<sup>2</sup></b> | <b>p-value</b> |
| Cohort                    | 0.05023              | 0.088          |
| Age                       | 0.02040              | 0.523          |
| Sex                       | 0.06557              | 0.047          |
| BMI                       | 0.00706              | 0.887          |

**Table S4. Differential taxa of shotgun data using DESeq2. Related to Figure 1.**

**Table S5. Differential abundance testing of microbially encoded pathways using DESeq2. Related to Figure 1.**



**Table S6. PERMANOVA results for metabolite profiling. Related to Figure 2.**

| <b>Plasma metabolites</b> |                      |                |
|---------------------------|----------------------|----------------|
| <b>Variable</b>           | <b>R<sup>2</sup></b> | <b>p-value</b> |
| BMI                       | 0.05788              | 0.001          |
| Age                       | 0.02676              | 0.026          |
| Sex                       | 0.01903              | 0.323          |
| Cohort                    | 0.06994              | 0.018          |
| Vitamin E                 | 0.01614              | 0.542          |
| Metformin                 | 0.02555              | 0.067          |
| <b>Fecal metabolites</b>  |                      |                |
| <b>Variable</b>           | <b>R<sup>2</sup></b> | <b>p-value</b> |
| BMI                       | 0.04392              | 0.024          |
| Age                       | 0.01360              | 0.526          |
| Sex                       | 0.01669              | 0.306          |
| Cohort                    | 0.05361              | 0.282          |
| Vitamin E                 | 0.02597              | 0.160          |
| Metformin                 | 0.06164              | 0.018          |

**Table S7. Random forests modeling of plasma and fecal metabolites. Related to Figure 2.**

**Table S8. Association between metabolite profiles and liver enzyme levels.  
Related to Figure 2.**

**Table S9. Confusion matrices for RF models of disease cohort and histology findings. Related to all Figures.**

**Cohort, fecal**

|       |          | Predicted |          |       |      |                 |
|-------|----------|-----------|----------|-------|------|-----------------|
|       |          | NMLBMI    | ObeseNML | NAFLD | NASH | Class error (%) |
| Truth | NMLBMI   | 18        | 1        | 1     | 0    | 10              |
|       | ObeseNML | 2         | 7        | 8     | 3    | 65              |
|       | NAFLD    | 1         | 4        | 14    | 7    | 46.2            |
|       | NASH     | 0         | 5        | 10    | 4    | 78.9            |

**Cohort, plasma**

|       |          | Predicted |          |       |      |                 |
|-------|----------|-----------|----------|-------|------|-----------------|
|       |          | NMLBMI    | ObeseNML | NAFLD | NASH | Class error (%) |
| Truth | NMLBMI   | 20        | 0        | 0     | 0    | 0               |
|       | ObeseNML | 4         | 6        | 10    | 0    | 70              |
|       | NAFLD    | 1         | 8        | 14    | 3    | 46.2            |
|       | NASH     | 0         | 0        | 5     | 9    | 35.7            |

**Diagnosis2, fecal**

|       |                | Predicted      |              |                 |
|-------|----------------|----------------|--------------|-----------------|
|       |                | BorderlineNASH | DefiniteNASH | Class error (%) |
| Truth | BorderlineNASH | 7              | 1            | 12.5            |
|       | DefiniteNASH   | 2              | 11           | 15.4            |

**Steatosis2, fecal**

|       |   | Predicted |   |   |                 |
|-------|---|-----------|---|---|-----------------|
|       |   | 1         | 2 | 3 | Class error (%) |
| Truth | 1 | 7         | 0 | 0 | 0               |
|       | 2 | 2         | 7 | 0 | 22.2            |
|       | 3 | 1         | 0 | 4 | 20.0            |

**Fibrosis2, fecal**

|       |          | Predicted |          |                 |
|-------|----------|-----------|----------|-----------------|
|       |          | Mild      | Advanced | Class error (%) |
| Truth | Mild     | 11        | 2        | 15.4            |
|       | Advanced | 3         | 5        | 37.5            |

**LobularInflammation2, fecal**

|       |   | Predicted |    |                 |
|-------|---|-----------|----|-----------------|
|       |   | 1         | 2  | Class error (%) |
| Truth | 1 | 5         | 3  | 37.5            |
|       | 2 | 1         | 12 | 7.7             |

**Ballooning, fecal**

|       |   | Predicted |   |                 |
|-------|---|-----------|---|-----------------|
|       |   | 1         | 2 | Class error (%) |
| Truth | 1 | 12        | 2 | 14.3            |
|       | 2 | 2         | 5 | 28.6            |

**Diagnosis2, plasma**

|       |                | Predicted      |              |                 |
|-------|----------------|----------------|--------------|-----------------|
|       |                | BorderlineNASH | DefiniteNASH | Class error (%) |
| Truth | BorderlineNASH | 3              | 2            | 40              |
|       | DefiniteNASH   | 0              | 11           | 0               |

**Steatosis2, plasma**

|       |   | Predicted |   |   |                 |
|-------|---|-----------|---|---|-----------------|
|       |   | 1         | 2 | 3 | Class error (%) |
| Truth | 1 | 3         | 0 | 1 | 25              |
|       | 2 | 0         | 7 | 0 | 0               |
|       | 3 | 0         | 0 | 5 | 0               |

**Fibrosis2, plasma**

|       |          | Predicted |          |                 |
|-------|----------|-----------|----------|-----------------|
|       |          | Mild      | Advanced | Class error (%) |
| Truth | Mild     | 8         | 1        | 11.1            |
|       | Advanced | 0         | 7        | 0               |

**LobularInflammation2, plasma**

|       |   | Predicted |    |                 |
|-------|---|-----------|----|-----------------|
|       |   | 1         | 2  | Class error (%) |
| Truth | 1 | 5         | 1  | 16.7            |
|       | 2 | 0         | 10 | 0               |

**Ballooning, plasma**

|       |   | Predicted |   |                 |
|-------|---|-----------|---|-----------------|
|       |   | 1         | 2 | Class error (%) |
| Truth | 1 | 8         | 1 | 11.1            |
|       | 2 | 3         | 4 | 42.9            |
